# Supplementary material
Source: PubMed Central journal article supplement (PMC4722554)
Supplement: Supp_Fig1.pdf [file Supp_Fig1.pdf]

## Supplementary Data

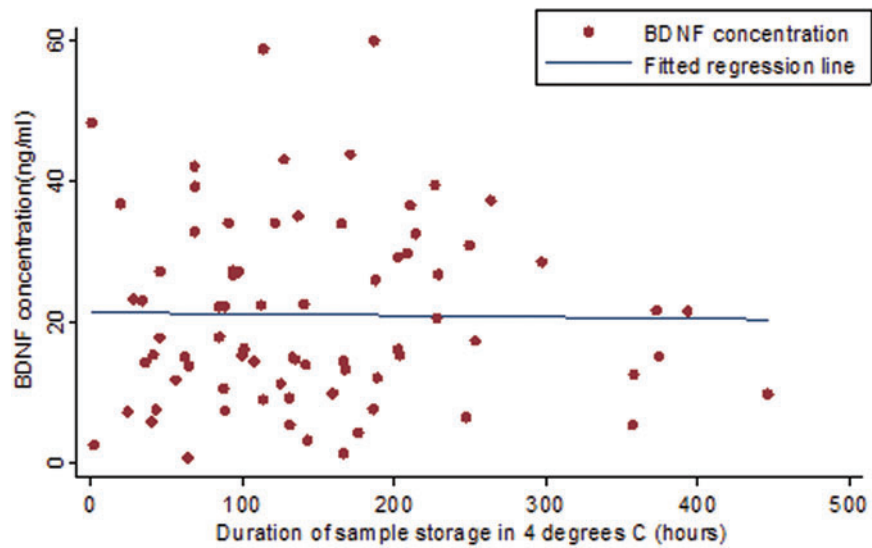

**SUPPLEMENTARY FIG. 1.** Relationship between duration of sample storage in 4°C and brain-derived neurotrophic factor (BDNF) value in Johns Hopkins Hospital (JHH) traumatic brain injury (TBI) cases. This figure is a graphical display of BDNF values and the corresponding duration of sample storage at 4°C in JHH TBI cases. There was no significant association between BDNF value and duration of sample storage. The slope of the fitted regression line is 0.0023.  $p=0.88$ .
